# Supplementary figures and images for: Graphene oxide magnetic nanocomposites for the preconcentration of trace amounts of malachite green from fish and water samples prior to determination by fiber optic-linear array detection spectrophotometry
Source: Royal Society of Chemistry journal article supplement (doi:10.1039/c4ay01054j), 2014-08-18

**Fig. S1** Malachite green calibration curve.

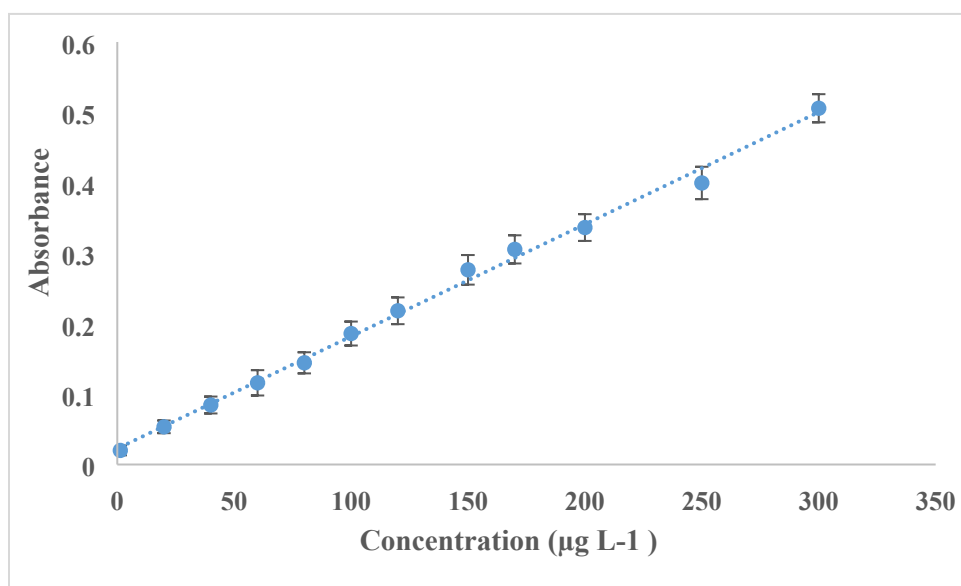

**Fig. S1**

Supplement: c4ay01054j1.pdf [file c4ay01054j1.pdf]
